# Supplementary material for: Depolymerization mechanism of MgO on a silicate microstructure under different CaO contents: a theoretical and experimental study
Source: Royal Society of Chemistry journal article supplement (doi:10.1039/d4nj00454j), 2024-01-01
Supplement: d4nj00454j1.pdf [file d4nj00454j1.pdf]

## Electronic supplementary information (ESI)

# Depolymerization mechanism of MgO on silicate microstructure under different CaO content: A theoretical and experimental study

Maierhaba Abudourehman<sup>a</sup>, Lanzhen He<sup>a</sup>, Fangru Ma<sup>a</sup>, Bo Wei<sup>a\*</sup>, Jianjiang Wang<sup>a</sup>, Quan Zhu<sup>b</sup>,  
Hong Yao<sup>c</sup>

<sup>a</sup> *State Key Laboratory of Chemistry and Utilization of Carbon Based Energy Resources, Xinjiang Key Laboratory of Clean Conversion and Chemical Engineering Process, School of Chemical Engineering and Technology, Xinjiang University, Urumqi, 830017, China;*

<sup>b</sup> *School of Chemical Engineering, Sichuan University, Chengdu 610065, China;*

<sup>c</sup> *State Key Laboratory of Coal Combustion, Huazhong University of Science and Technology, Wuhan 430074, China;*

\* Corresponding authors, E-mail: weiboxju@163.com (B. Wei)

## 1. Theoretical details

Table S1 Potential parameters between different particles and oxygen ions in MgO-CaO-SiO<sub>2</sub>-Al<sub>2</sub>O<sub>3</sub> system

| Atom<br>1 | Atom<br>2 | $A_{ij}/(\text{eV})$ | $B_{ij}/(\text{\AA}^{-1})$ | $C_{ij}/(\text{eV}\cdot\text{\AA}^6)$ |
|-----------|-----------|----------------------|----------------------------|---------------------------------------|
| Si        | O         | 62794.37             | 6.06                       | 0                                     |
| Al        | O         | 86057.58             | 6.06                       | 0                                     |
| Ca        | O         | 717827.00            | 6.06                       | 8.67                                  |
| Mg        | O         | 154917.90            | 6.06                       | 1.73                                  |
| O         | O         | 1497049.00           | 5.88                       | 17.34                                 |

Table S2 Particle number and density of MgO-CaO-SiO<sub>2</sub>-Al<sub>2</sub>O<sub>3</sub> system in high calcium system

| Mole fraction (%) |     |     | Atomic number |     |      | Density              | Box           |
|-------------------|-----|-----|---------------|-----|------|----------------------|---------------|
| MgO               | Ca  | Si  | Al            | Mg  | O    | (g/cm <sup>3</sup> ) | length<br>(Å) |
| 1                 | 653 | 576 | 771           | 16  | 2982 | 2.762                | 40.594        |
| 3                 | 661 | 560 | 753           | 50  | 2971 | 2.765                | 40.595        |
| 5                 | 669 | 543 | 736           | 84  | 2960 | 2.767                | 40.603        |
| 7                 | 677 | 526 | 718           | 118 | 2949 | 2.768                | 40.61         |
| 9                 | 685 | 509 | 699           | 154 | 2937 | 2.769                | 40.616        |
| 11                | 694 | 491 | 680           | 191 | 2925 | 2.77                 | 40.633        |
| 13                | 703 | 474 | 661           | 228 | 2913 | 2.771                | 40.648        |

Table S3 Particle number and density of MgO-CaO-SiO<sub>2</sub>-Al<sub>2</sub>O<sub>3</sub> system in low calcium system

| Mole fraction (%) |     |     | Atomic number |     |      | Density<br>(g/cm <sup>3</sup> ) | Box<br>length<br>(Å) |
|-------------------|-----|-----|---------------|-----|------|---------------------------------|----------------------|
| MgO               | Ca  | Si  | Al            | Mg  | O    |                                 |                      |
| 1                 | 292 | 693 | 923           | 15  | 3077 | 2.699                           | 40.205               |
| 3                 | 295 | 682 | 910           | 44  | 3069 | 2.704                           | 40.595               |
| 5                 | 299 | 672 | 896           | 75  | 3060 | 2.708                           | 40.603               |
| 7                 | 302 | 661 | 881           | 106 | 3051 | 2.713                           | 40.611               |
| 9                 | 305 | 650 | 866           | 137 | 3041 | 2.717                           | 40.616               |
| 11                | 308 | 638 | 851           | 170 | 3032 | 2.724                           | 40.633               |
| 13                | 312 | 627 | 836           | 203 | 3022 | 2.721                           | 40.648               |

## 2. FTIR experiment details

Table S4 Specific components of samples with MgO content of 1, 5, 9 mol% under high calcium

| Group | Ash weight(wt%) |                  |                                |     | Ash composition(mol%) |                  |                                |     |
|-------|-----------------|------------------|--------------------------------|-----|-----------------------|------------------|--------------------------------|-----|
|       | CaO             | SiO <sub>2</sub> | Al <sub>2</sub> O <sub>3</sub> | MgO | CaO                   | SiO <sub>2</sub> | Al <sub>2</sub> O <sub>3</sub> | MgO |
| I     | 32.9            | 31.2             | 35.3                           | 0.6 | 40                    | 35.4             | 23.6                           | 1   |
| II    | 33.6            | 29.7             | 33.6                           | 3.0 | 40                    | 33               | 22                             | 5   |
| III   | 34.4            | 28.2             | 31.9                           | 5.6 | 40                    | 30.6             | 20.4                           | 9   |

Table S5 Specific components of samples with MgO content of 1, 5, 9 mol% under low calcium

| Group | Ash weight(wt%) |                  |                                |     | Ash composition(mol%) |                  |                                |     |
|-------|-----------------|------------------|--------------------------------|-----|-----------------------|------------------|--------------------------------|-----|
|       | CaO             | SiO <sub>2</sub> | Al <sub>2</sub> O <sub>3</sub> | MgO | CaO                   | SiO <sub>2</sub> | Al <sub>2</sub> O <sub>3</sub> | MgO |
| I     | 15.5            | 39.4             | 44.6                           | 0.6 | 20                    | 47.4             | 31.6                           | 1   |
| II    | 15.8            | 38.2             | 43.2                           | 2.9 | 20                    | 45               | 30                             | 5   |
| III   | 16.2            | 36.9             | 41.7                           | 5.2 | 20                    | 42.6             | 28.4                           | 9   |
